# Supplementary material for: Challenges and Opportunities for Mental Health and Psychosocial Support in the COVID-19 Response in Africa: A Mixed-Methods Study
Source: MDPI journal article supplement (doi:10.3390/ijerph19159313), 2022-07-29
Supplement: s1 [file s1]

## Supplementary information S2 : Interview topic guide

| Theme                            | Stem questions                                                                                           | Potential follow up questions:                                                                                                                                                                                                                                                           |
|----------------------------------|----------------------------------------------------------------------------------------------------------|------------------------------------------------------------------------------------------------------------------------------------------------------------------------------------------------------------------------------------------------------------------------------------------|
| <b>Planning and coordination</b> | What is your role?                                                                                       |                                                                                                                                                                                                                                                                                          |
|                                  | Can you tell me about how the MHPSS aspects of COVID-19 outbreak response were coordinated?              |                                                                                                                                                                                                                                                                                          |
|                                  | Was there previous experience of outbreak response at the national or subnational level in your country? | <p>How did MHPSS aspects of the response to COVID-19 compare to previous outbreaks?</p> <p>What lessons were learned in terms of integrating MHPSS in outbreak responses?</p> <p>Did MHPSS work as part of previous outbreak responses help with the response this time? If so, how?</p> |
| <b>Delivering support</b>        | What were the main MHPSS needs in response to COVID-19?                                                  | <p>How were these assessed?</p> <p>Were they different to previous outbreaks or emergencies?</p>                                                                                                                                                                                         |
|                                  | What support has been provided                                                                           |                                                                                                                                                                                                                                                                                          |
|                                  | <p>What needs have not been addressed?</p> <p>If not mentioned, ask about HCWs, children, carers</p>     | <p>Why/why not?</p> <p>What needs to be done to address these?</p>                                                                                                                                                                                                                       |
|                                  | Was MHPSS integrated into other sectoral response (eg social protection, education etc)                  | <p>How did this happen?</p> <p>How/why not?</p> <p>What would have helped?</p>                                                                                                                                                                                                           |
|                                  | Has any support been planned to address the longer term impacts of COVID-19 on mental health?            |                                                                                                                                                                                                                                                                                          |
|                                  | Will MHPSS efforts in response to COVID-19 strengthen public mental health after the outbreak?           | <p>If yes – how?</p> <p>If no – why not?</p>                                                                                                                                                                                                                                             |

|                                                |                                                                                                        |                                                                                                                                                                 |
|------------------------------------------------|--------------------------------------------------------------------------------------------------------|-----------------------------------------------------------------------------------------------------------------------------------------------------------------|
| <b>Enablers</b>                                | Can you tell us more about what you felt went well in the mental health response overall?              | Why was that the case?<br>What could have helped you more?<br>What should be done differently?                                                                  |
|                                                | What were the factors that supported these achievements?                                               | How did these help?<br>Were these easy/difficult to get?                                                                                                        |
|                                                | What could be done to build on these successes?                                                        |                                                                                                                                                                 |
| <b>Barriers</b>                                | What were the overall challenges faced in coordinating the MHPSS response?                             | What was/is needed to address these challenges?                                                                                                                 |
|                                                | <i>[if needed] What were the factors that contributed to these challenges?</i>                         |                                                                                                                                                                 |
| <b>Specific factors (if not covered above)</b> | In terms of outbreak preparedness, was MHPSS addressed in preparedness planning?                       |                                                                                                                                                                 |
|                                                | Was there political commitment to address MHPSS as part of the response?                               | If no - why not?<br>If yes – how was this achieved?<br><br>What would be most useful to support political advocacy in your country?                             |
|                                                | Was funding of MHPSS appropriate for the level of need, relative to other needs                        | If yes – how was funding secured<br>If no – why not?<br><br>What would be needed to make the case for extra funding?                                            |
|                                                | What are your country's human resource needs to be able to better respond to MHPSS needs in outbreaks? |                                                                                                                                                                 |
|                                                |                                                                                                        |                                                                                                                                                                 |
| <b>Existing support</b>                        | Was national or international guidance used to help plan the response?                                 | Was this national or international?<br><br>Were these guidelines useful in your context? Why/why not?<br><br>What were the barriers in guidance implementation? |

|                      |                                                                                                                                                                   |                                                                                                                                                                           |
|----------------------|-------------------------------------------------------------------------------------------------------------------------------------------------------------------|---------------------------------------------------------------------------------------------------------------------------------------------------------------------------|
|                      |                                                                                                                                                                   |                                                                                                                                                                           |
|                      | <p>Which other actors supported the mental health aspects of the response?</p> <p>If not mentioned ask about: multilateral agencies, civil society, the media</p> | <p>What support was provided?</p> <p>Was it helpful? Why?</p> <p>What more was needed?</p>                                                                                |
| <b>Support needs</b> | What training have you found most useful for your role?                                                                                                           | Do you have any further support needs?                                                                                                                                    |
|                      | What is needed to support implementation of MHPSS support as part of outbreak responses?                                                                          | <p>If not mentioned ask about:</p> <p>Implementation guidance – eg<br/>Minimum service packages</p> <p>Support with strategy development</p> <p>Sharing best practice</p> |
